# Supplementary material for: The role of miR-200b/c in balancing EMT and proliferation revealed by an activity reporter
Source: PubMed Central journal article supplement (PMC7994202; doi:10.1038/s41388-021-01708-6), 2021-03-02
Supplement: 41388_2021_1708_MOESM1_ESM.pdf [file 41388_2021_1708_MOESM1_ESM.pdf]

# Supplementary Figure 1

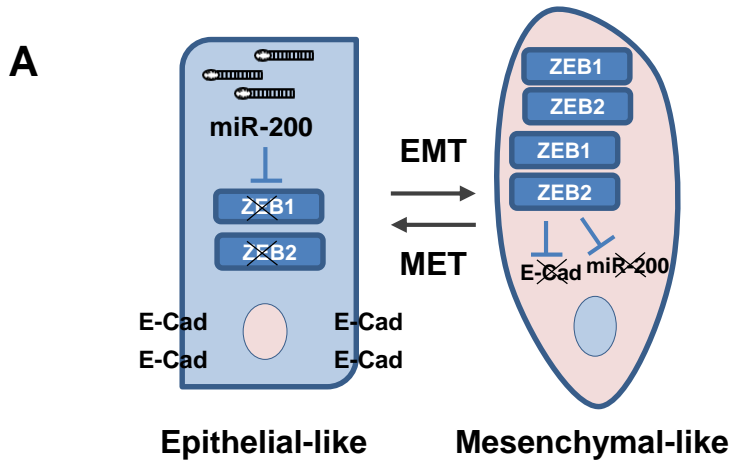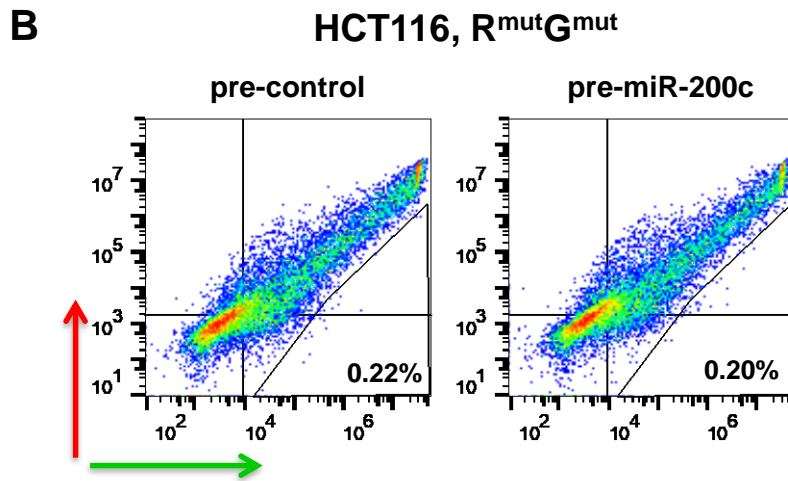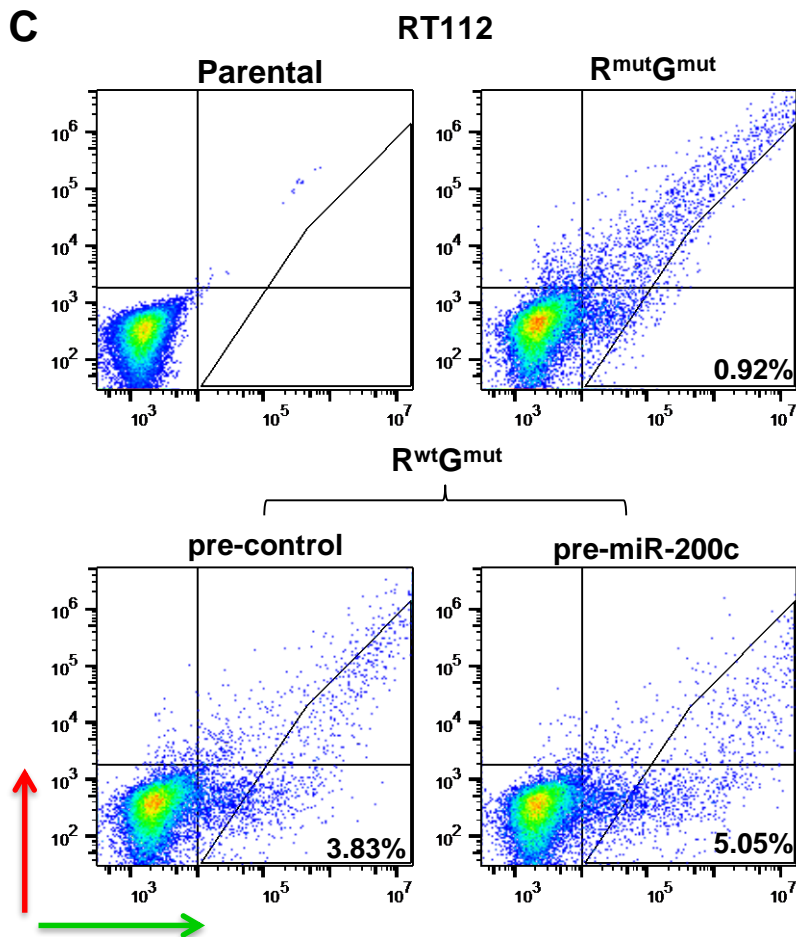

# Supplementary Figure 2

**A**

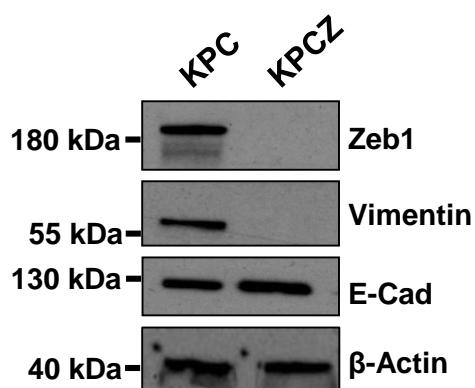

**B**

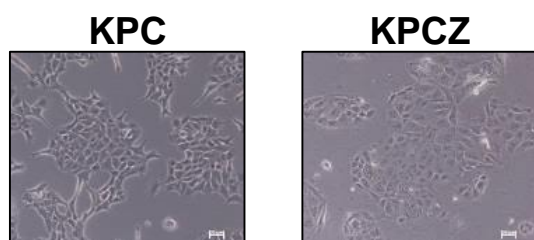

**C**

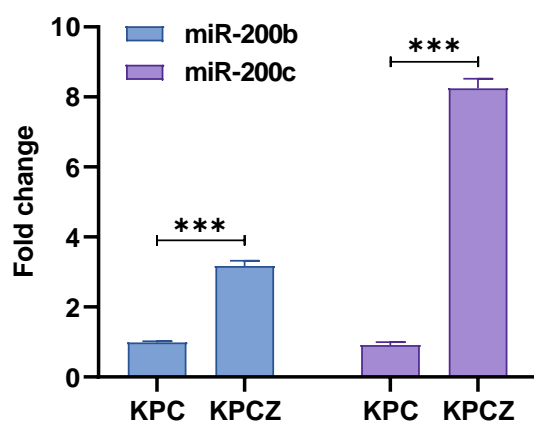

**D**

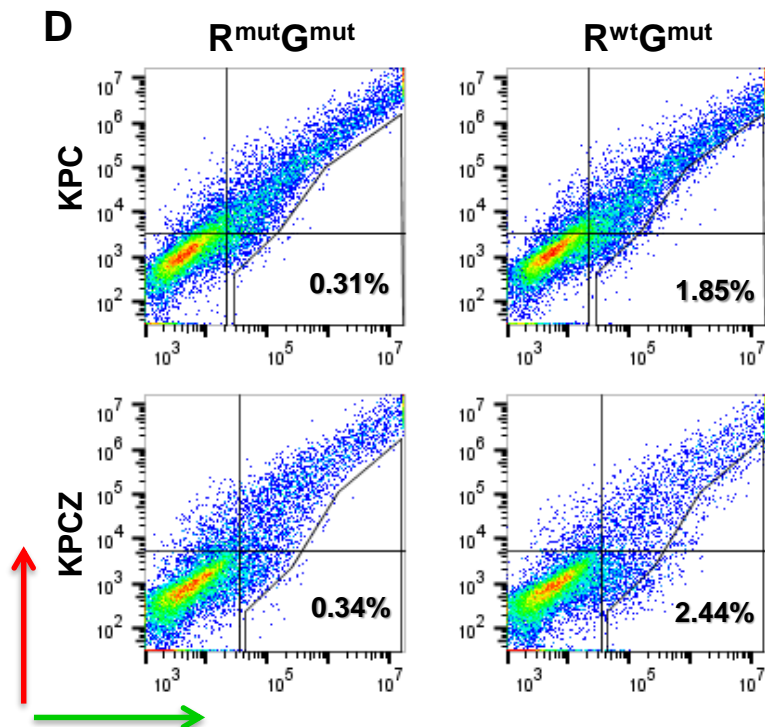

**E**

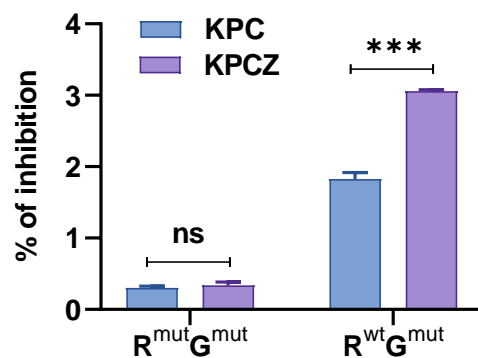

# Supplementary Figure 3

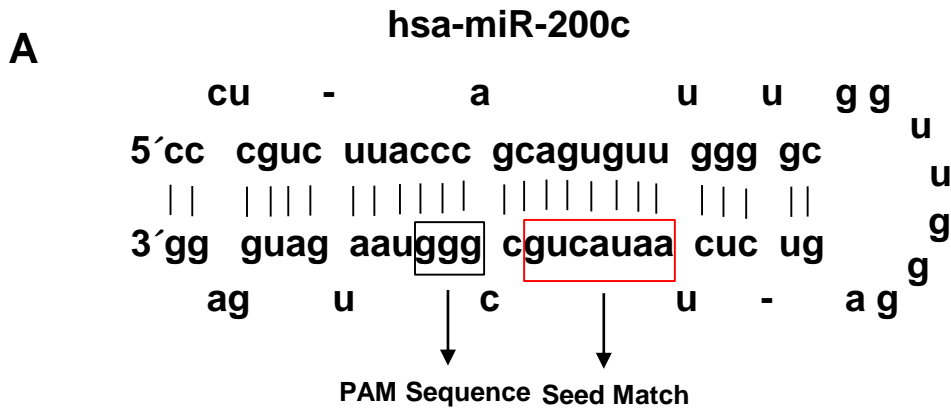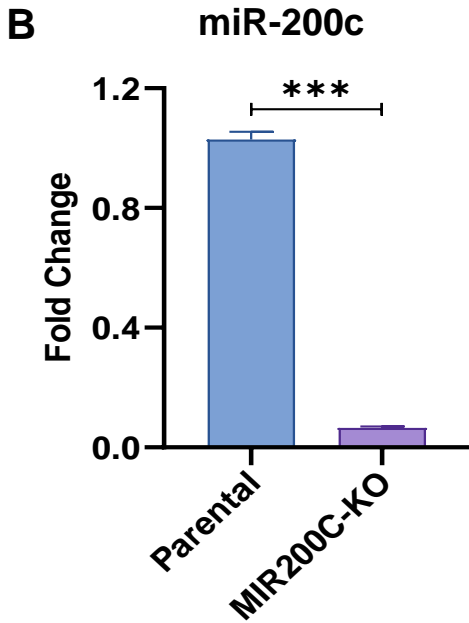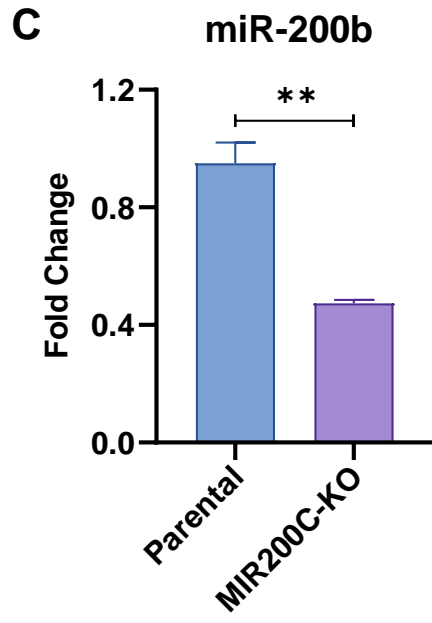

**D**

**MIR200C**

```

CloneIII CCTGAAGCTGCCTGACCCAAGGTGGGCGGGCTGGGCGGGGGCCCTCGTCTTACCCAGCAG 119
CloneI CCTGAAGCTGCCTGACCCAAGGTGGGCGGGCTGGGCGGGGGCCCTCGTCTTACCCAGCAG 120
CloneII CCTGAAGCTGCCTGACCCAAGGTGGGCGGGCTGGGCGGGGGCCCTCGTCTTACCCAGCAG 119
CloneIV CCTGAAGCTGCCTGACCCAAGGTGGGCGGGCTGGGCGGGGGCCCTCGTCTTACCCAGCAG 119
miR200c -----CCCTCGTCTTACCCAGCAG 19
*****
    
```

```

CloneIII TGTTTGGGTGCTGATGATAGACGCTCATGTCTGTGTGTCACACGAGTCCATCCCCGTCCG 179
CloneI TGTTTGGGTGCGGTTGGGATCTTGTGGCTGGCTGCGACTATGGTACACGATGGTCTCCA 180
CloneII TGTTTGGGTGCGGTTGGGAGTCTCTAATACTTGCGGGGAAAATATAGACGCCTGTGTCTG 179
CloneIV TGTTTGGGTGCGGTTGGGAGTCTCTAATACTTGCCGGTAATGATGGAGGCCCTGTCCC 179
miR200c TGTTTGGGTGCGGTTGGGAGTCTCTAATACTGCCGGTAATGATGGAGG----- 68
***** ** * * *
    
```

**MIR200B**

```

CloneIV CCTCAGCCGGGCGGCCCCCGGACCCAGCTCGGGCAGCCGTGGCCATCTTACTGGGCAGCA 180
CloneIII CCTCAGCCGGGCGGCCCCCGGACCCAGCTCGGGCAGCCGTGGCCATCTTACTGGGCAGCA 178
CloneII CCTCAGCCGGGCGGCCCCCGGACCCAGCTCGGGCAGCCGTGGCCATCTTACTGGGCAGCA 179
CloneI CCTCAGCCGGGCGGCCCCCGGACCCAGCTCGGGCAGCCGTGGCCATCTTACTGGGCAGCA 179
miR200b -----CCAGCTCGGGCAGCCGTGGCCATCTTACTGGGCAGCA 37
*****
    
```

```

CloneIV TTGGATGGAGTCAAGTCTCTAATACTGCCTGGTAATGATGACGGCGGAGCCCTGCACGCA 240
CloneIII TTGGATGGAGTCAAGTCTCTAATACTGCCTGGTAATGATGACGGCGGAGCCCTGCACGCA 238
CloneII TTGGATGGAGTCAAGTCTCTAATACTGCCTGGTAATGATGACGGCGGAGCCCTGCACGCA 239
CloneI TTGGATGGAGTCAAGTCTCTAATACTGCCTGGTAATGATGACGGCGGAGCCCTGCACGCA 239
miR200b TTGGATGGAGTCAAGTCTCTAATACTGCCTGGTAATGATGACGGCGGAGCCCTGCACG-- 95
*****
    
```

# Supplementary Figure 4

**A**

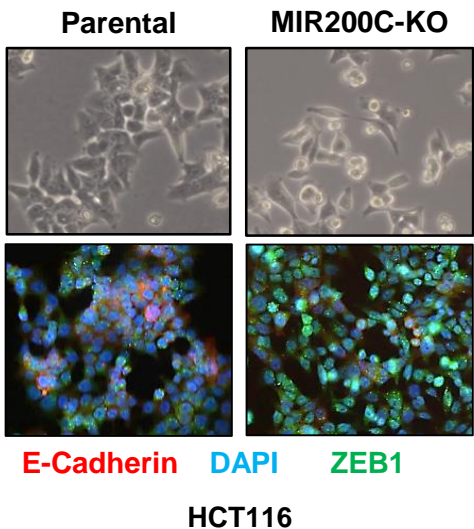

**B**

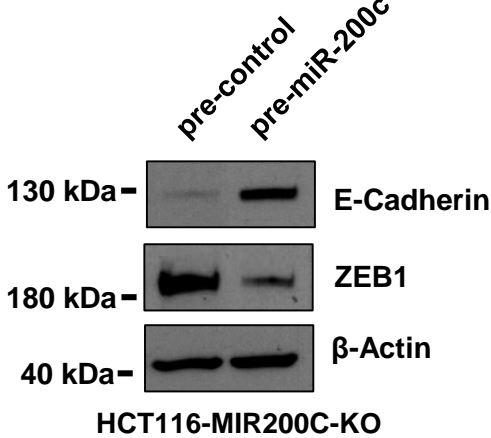

# Supplementary Figure 5

**A**

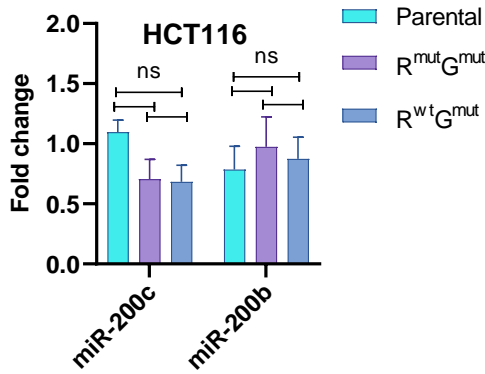

**B**

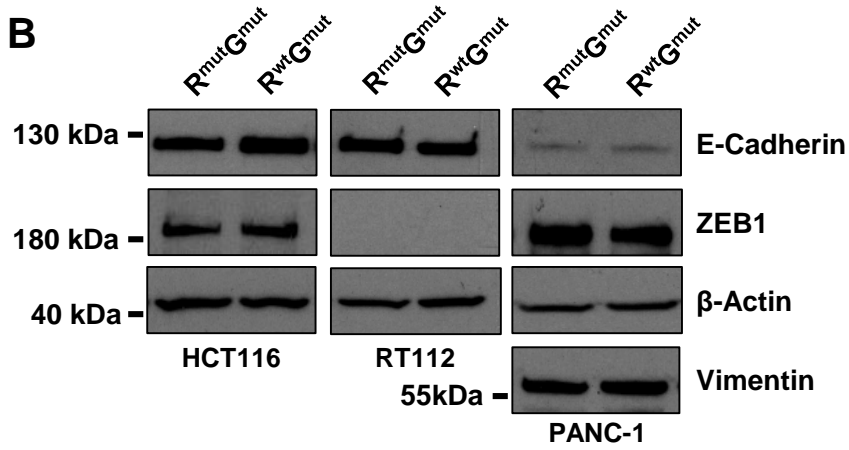

**C**

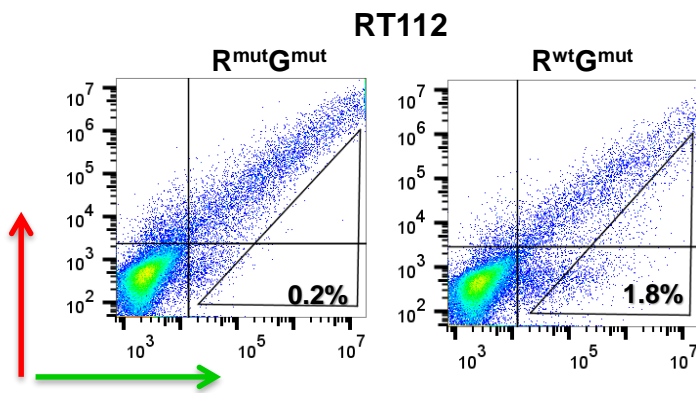

**D**

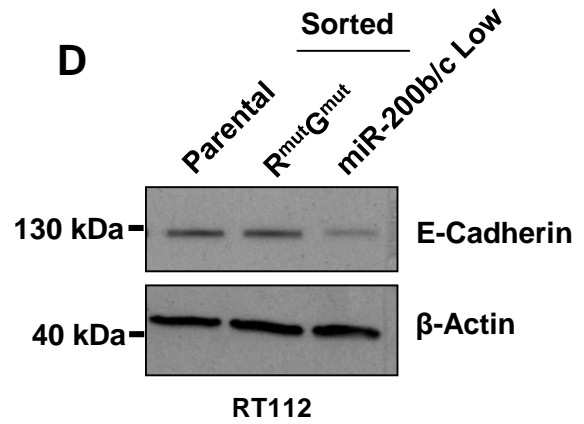

**E**

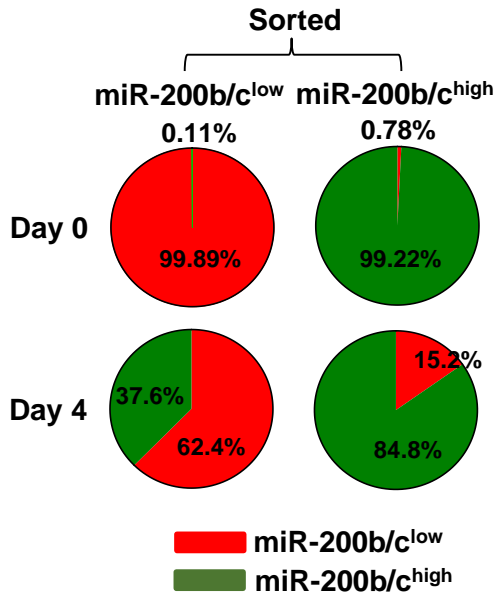

**F**

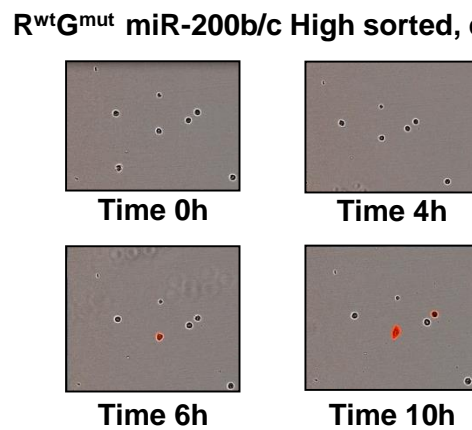

**G**

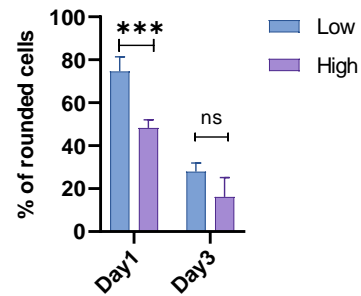

**H**

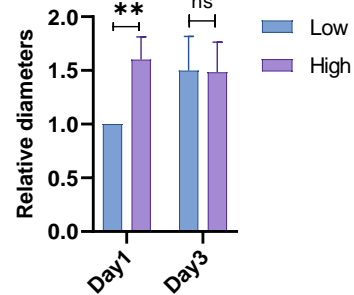

# Supplementary Figure 6

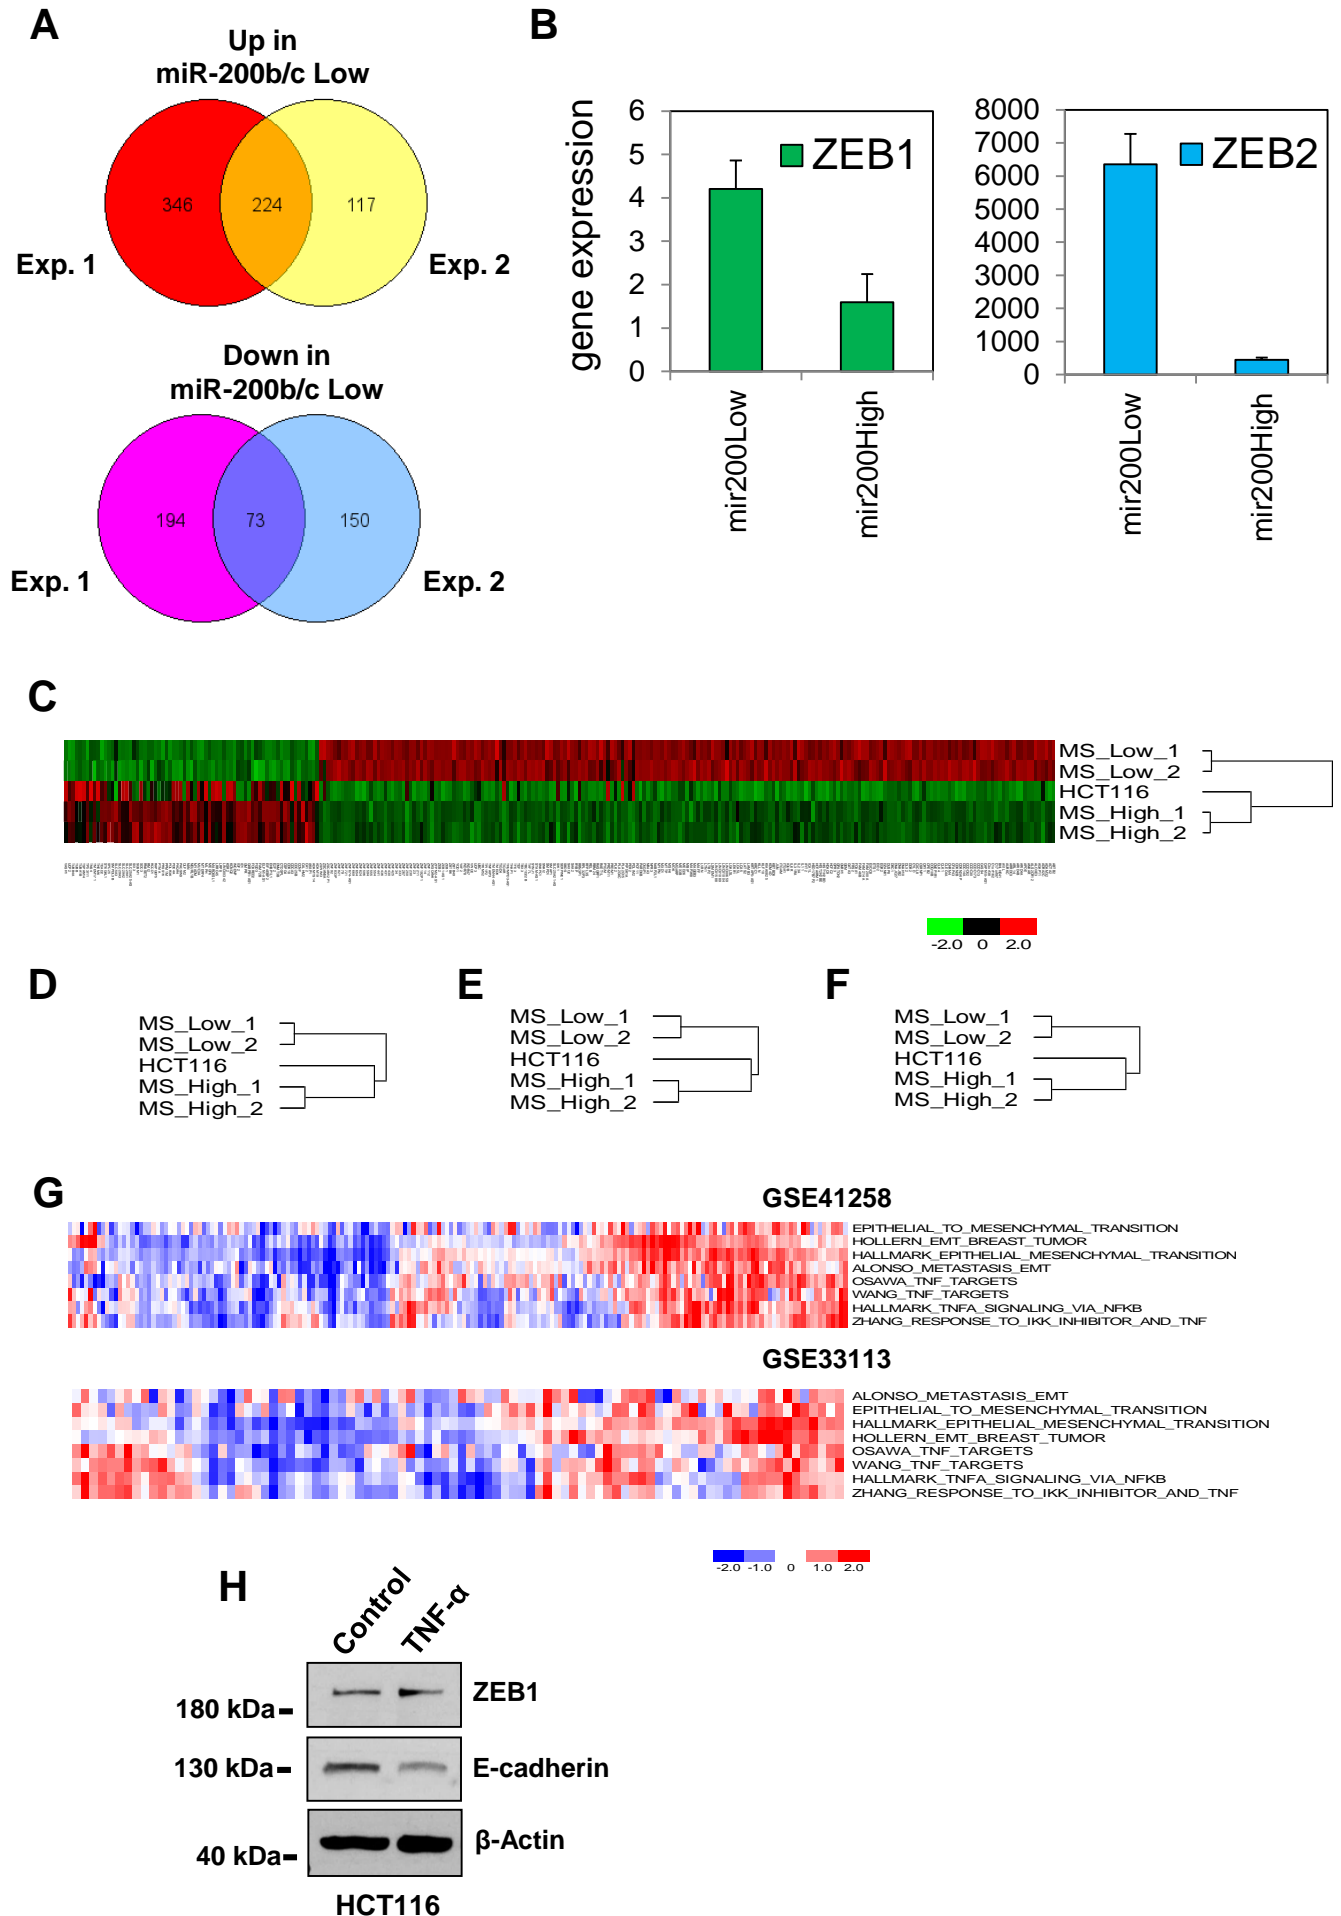

# Supplementary Figure 7

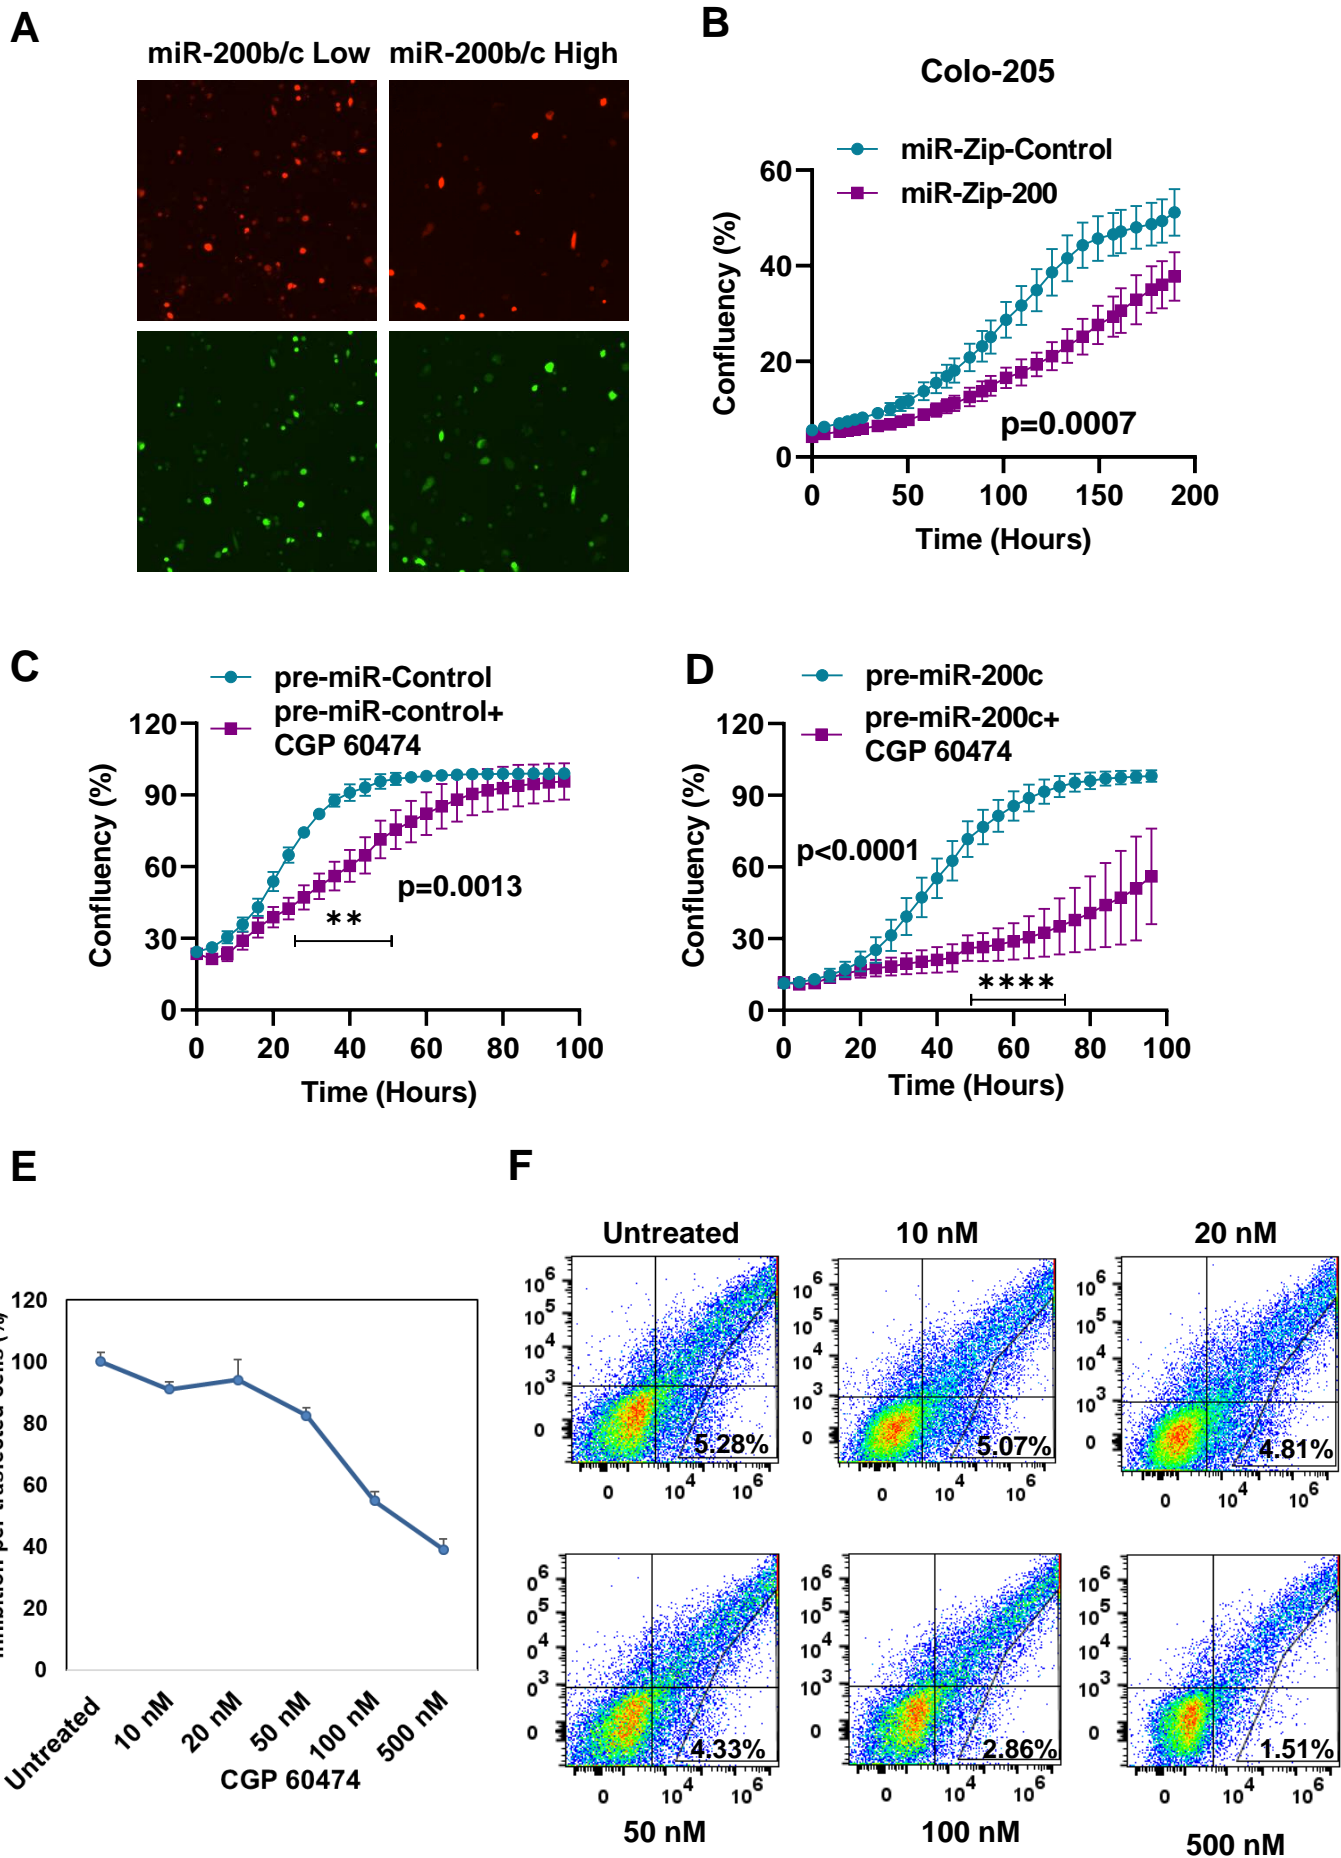

# Supplementary Figure 8

A

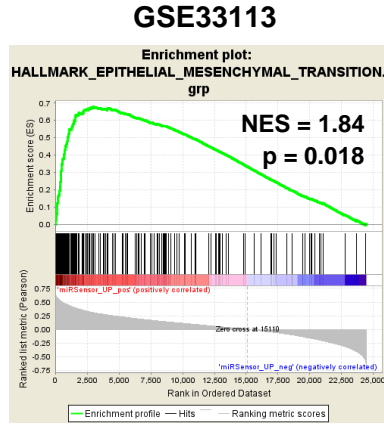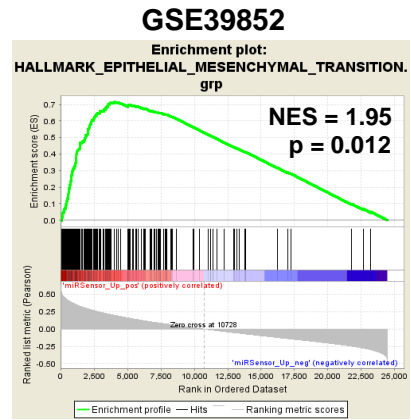

B

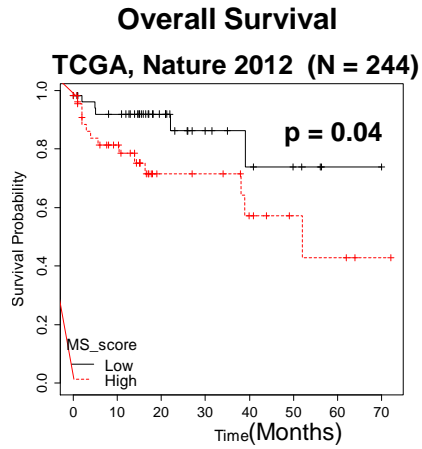



# Supplementary Figure 9

## miR-Sensor RNA-Seq

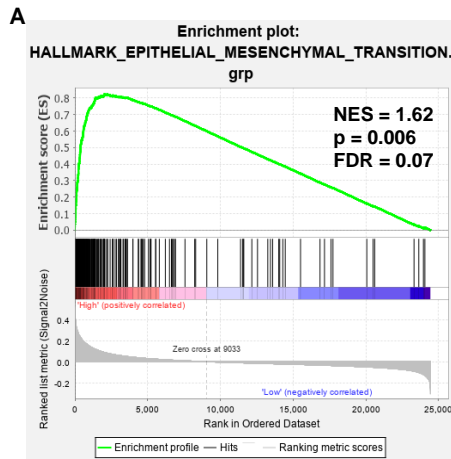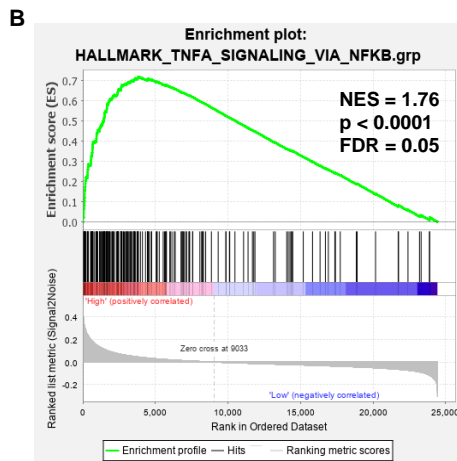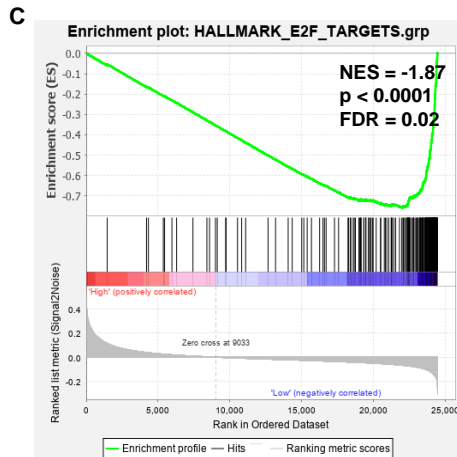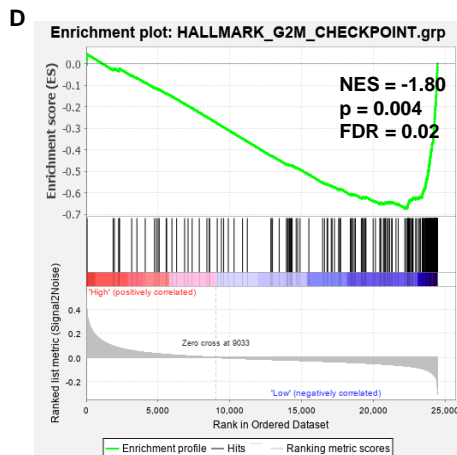

## miR-200c

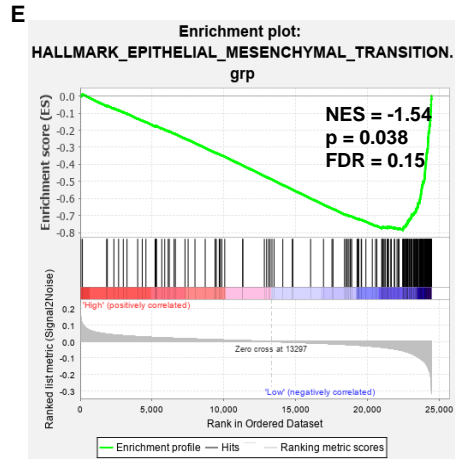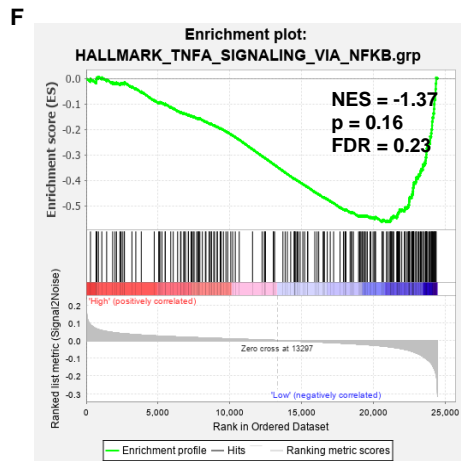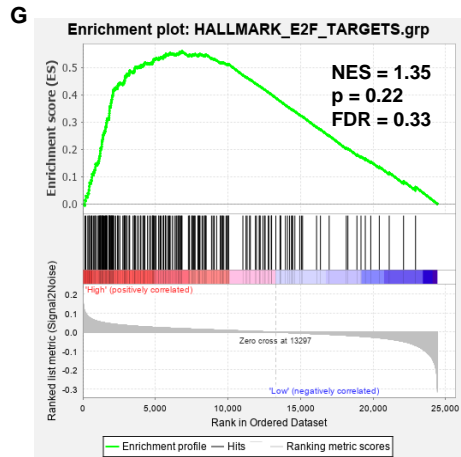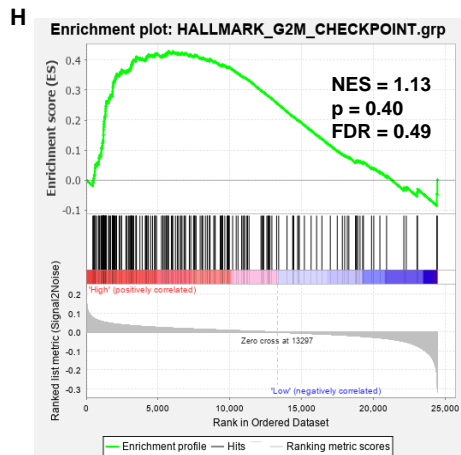

# Supplementary Figure 10

**A**

|   | Label     | TotalsgRNA | ZeroCounts | GiniIndex |
|---|-----------|------------|------------|-----------|
| 1 | hct-hab-c | 119461     | 12264      | 0.21      |
| 2 | hct-hab-h | 119461     | 100644     | 0.88      |

Table 2: Summary of comparisons

## 2 Normalized read count distribution of all samples

The following figure shows the distribution of median-normalized read counts in all samples.

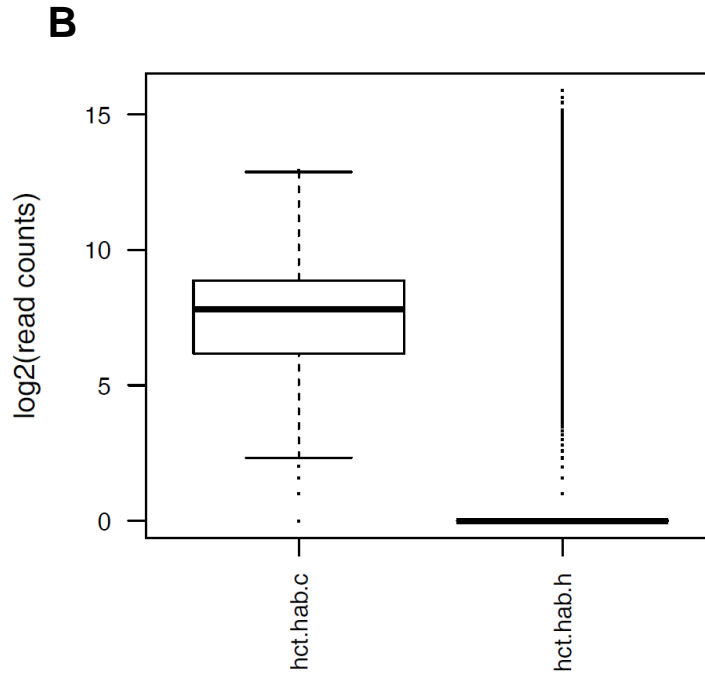

The following figure shows the histogram of median-normalized read counts in all samples.

# Supplementary Figure 11

**A**

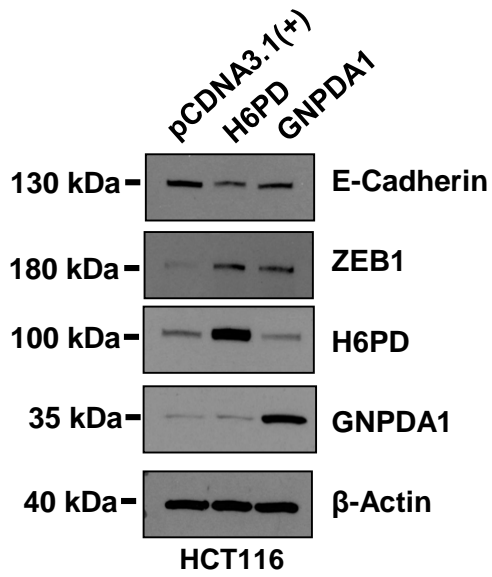

**B**

Correlation analysis between ZEB1 or VIM with H6PD  
TCGA, Cell 2018 – RNA Seq (N = 592)

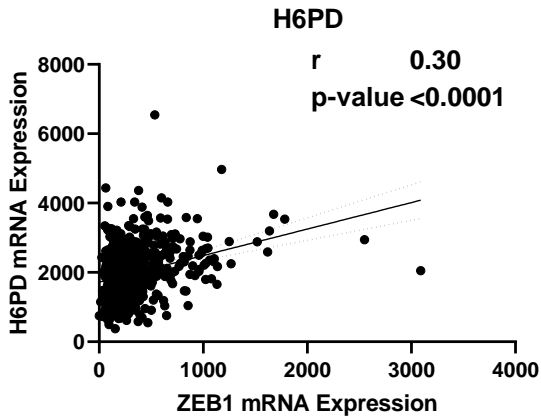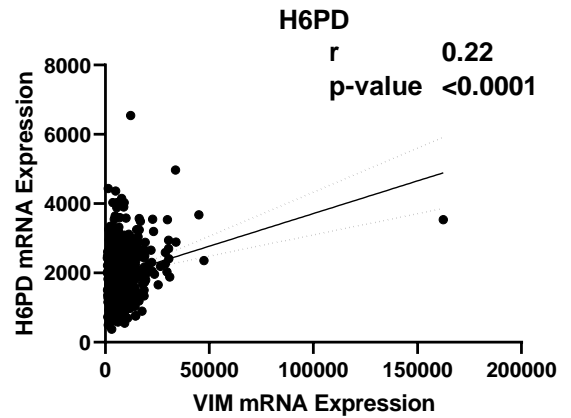

# Supplementary Figure 12

**A**

sgRNAs in OR52L1

sgRNAs in SLCO4A1

sgRNAs in HSD17B1

sgRNAs in PDLIM1

sgRNAs in ZNF334

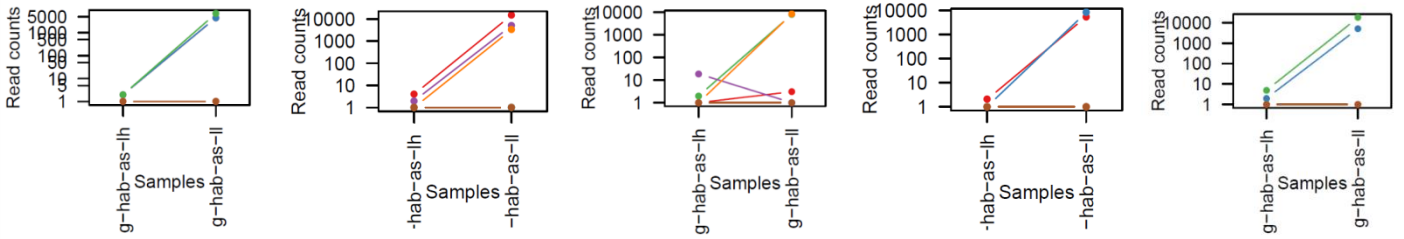

**B**

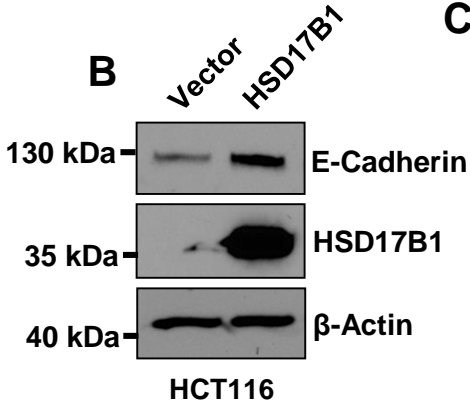

**C**

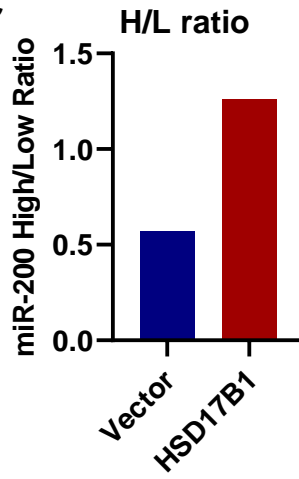

**D**

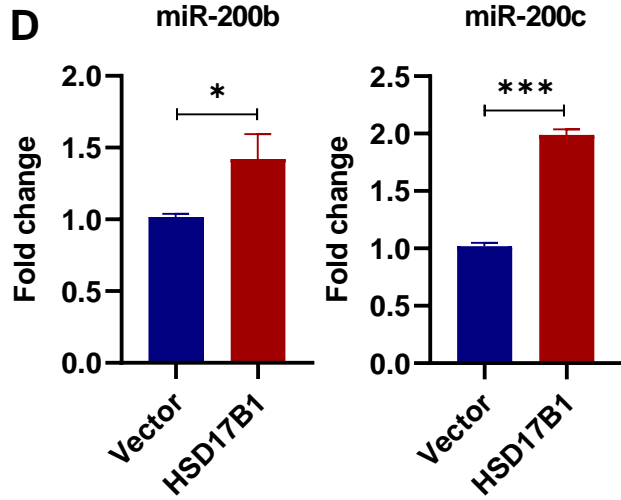

# Supplementary Figure 13

**A**

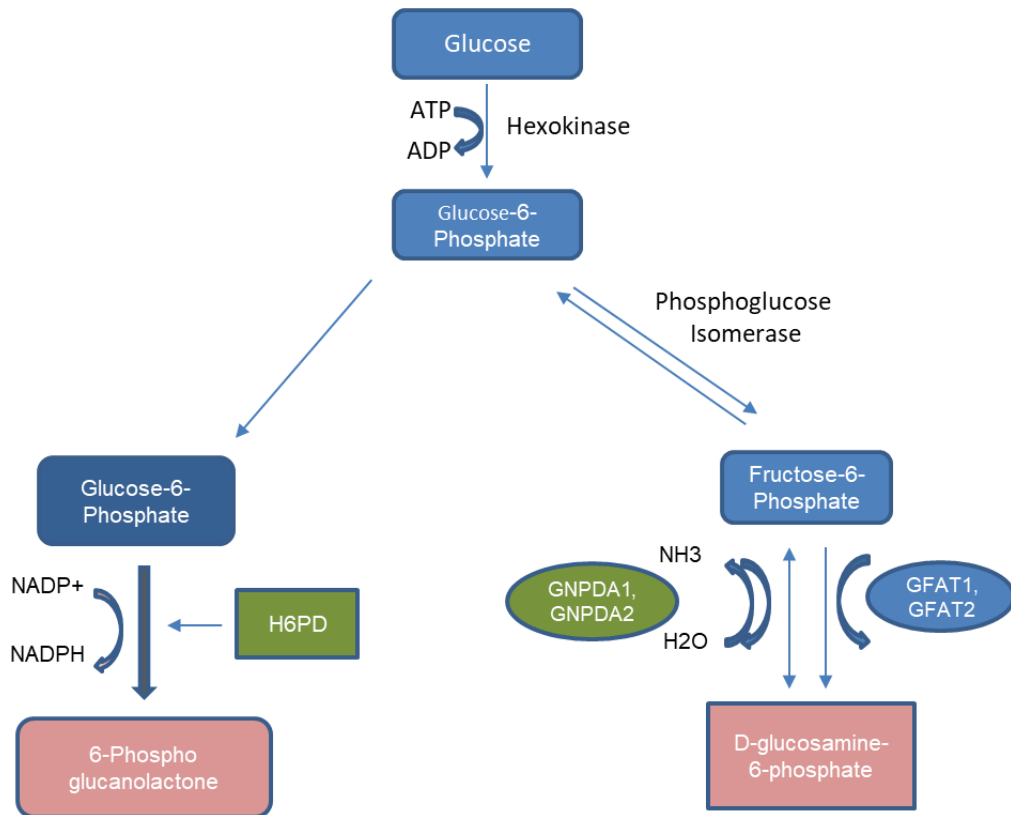

**B**

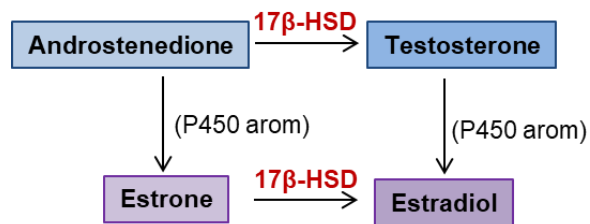

# Supplementary Table 1A

| Genes Up regulated in miR-200b/c Low |            |              |              |            |
|--------------------------------------|------------|--------------|--------------|------------|
| ABTB2                                | EGR2       | LOC100270804 | SBDS         | ZNF430     |
| ACTA2                                | EID2       | LOC100272217 | SELK         | ZNF431     |
| ADAM32                               | ETS1       | LOC100289230 | SERPINE1     | ZNF436     |
| ADRA2C                               | EXOC8      | LOC100506844 | SIK1         | ZNF441     |
| AGAP11                               | FAM179B    | LOC101928841 | SLC25A21-AS1 | ZNF554     |
| ALOXE3                               | FAM200A    | LOC644656    | SMAP1        | ZNF555     |
| ALS2CR12                             | FAM214A    | LOC646903    | SMPD1        | ZNF594     |
| ANKAR                                | FAM46B     | LRRC48       | SNAI2        | ZNF596     |
| APOE                                 | FLJ31104   | LSMEM1       | SNAPC1       | ZNF624     |
| ARID4A                               | FOXA1      | LTBP2        | STAM-AS1     | ZNF654     |
| ARID4B                               | FRS2       | LTN1         | SYNJ1        | ZNF669     |
| ARL14                                | GATA3      | LVRN         | TAF7L        | ZNF674-AS1 |
| ARRDC3                               | GEM        | MAFF         | TBC1D22B     | ZNF721     |
| AURKC                                | GNRH1      | MAGEB3       | TBX3         | ZNF79      |
| AVIL                                 | GPATCH2    | MAP3K8       | TEF          | ZNF821     |
| BHLHE41                              | GPR3       | MBIP         | TFE3         | ZNF833P    |
| C17orf97                             | HCFC2      | MED26        | THAP1        | ZNF92      |
| C18orf65                             | HDAC9      | MEX3B        | THUMPD3-AS1  | ZSCAN12P1  |
| C1orf162                             | HIST1H2BD  | MGARP        | TIGAR        | ZSCAN5A    |
| C3orf38                              | HIST1H4E   | MGC16142     | TIGD4        | ZSWIM3     |
| CAPN10-AS1                           | HIST2H2BE  | MOK          | TMED6        | ZNF430     |
| CASS4                                | HOTAIRM1   | MSH4         | TMEM44-AS1   | ZNF431     |
| CCDC13                               | HSD17B7P2  | MTTP         | TNFAIP3      | ZNF436     |
| CCDC173                              | ICA1L      | MURC         | TP1P2        | ZNF441     |
| CCDC30                               | IFIT2      | MXD1         | TRIM52       | ZNF554     |
| CCDC62                               | IL11       | MYPN         | TYW1B        | ZNF555     |
| CDC14A                               | IL23A      | N4BP2L1      | UBC          | ZNF594     |
| CDKN2AIP                             | IL31RA     | NPR3         | UCP3         | ZNF596     |
| CDKN2B                               | IL6R       | NR4A3        | VWCE         | ZNF624     |
| CFAP43                               | IQUB       | OVGP1        | WDR47        | ZNF654     |
| CHRM4                                | ITGA1      | PARD6B       | WDR78        | ZNF669     |
| CLEC4A                               | ITGAM      | PCF11        | YAF2         | ZNF674-AS1 |
| CLK1                                 | JUN        | PDLIM2       | YOD1         | ZNF721     |
| CLK4                                 | KBTBD8     | PER2         | ZBTB49       | ZNF79      |
| CNEP1R1                              | KDM4D      | PIP5K1A      | ZBTB6        | ZNF821     |
| COQ10B                               | KIAA0825   | PLA2G15      | ZEB1         | ZNF833P    |
| CPEB2                                | KLF10      | PLA2G4C      | ZEB1-AS1     | ZNF92      |
| CRY1                                 | KLLN       | PLK2         | ZEB2         | ZSCAN12P1  |
| CSRNP1                               | KRCC1      | PRDM1        | ZFPM2-AS1    | ZSCAN5A    |
| CTC-338M12.4                         | KRTAP5-AS1 | PRDM11       | ZKSCAN4      | ZSWIM3     |
| CXCL8                                | LAMB3      | PYGM         | ZNF112       | ZNF833P    |
| CYLD                                 | LATS2      | RAET1L       | ZNF14        | ZNF92      |
| DDR2                                 | LCA5       | RASGRF1      | ZNF192P1     | ZSCAN12P1  |
| DKFZP434I0714                        | LCA5L      | RBM24        | ZNF211       | ZSCAN5A    |
| DLX2                                 | LEKR1      | RELB         | ZNF23        | ZSWIM3     |
| DNAH10                               | LGALSL     | RFPL3S       | ZNF230       |            |
| DNAJB2                               | LINC00659  | RPL32P3      | ZNF250       |            |
| DNAJC27                              | LINC01004  | RRN3P1       | ZNF267       |            |
| DRC1                                 | LINC01024  | RYBP         | ZNF333       |            |
| DUSP8                                | LINC01089  | SAA2         | ZNF34        |            |
| DZANK1                               | LINC01588  | SAXO2        | ZNF425       |            |

# Supplementary Table 1B

| Genes Down regulated in miR-200b/c Low |              |
|----------------------------------------|--------------|
| ADAM19                                 | SDC3         |
| ADAMTS14                               | SGSM1        |
| AKAP1                                  | SIX3         |
| C14orf1                                | SLC25A25-AS1 |
| C14orf80                               | SLC29A1      |
| CA12                                   | SLC29A2      |
| CALHM2                                 | SLC29A3      |
| CCNF                                   | SLC5A3       |
| CDC25B                                 | SMPDL3B      |
| CDCA3                                  | SPC25        |
| CDK18                                  | ST6GAL1      |
| CSPG4                                  | TEAD2        |
| CTDSPL                                 | THEM6        |
| DNMT3B                                 | TMEM171      |
| E2F2                                   | TNS4         |
| EHBP1L1                                | TP53I11      |
| EIF4EBP2                               | TSPAN14      |
| ELFN1-AS1                              | TUBA1B       |
| FAM72B                                 | TUBB         |
| FGD3                                   | TUBB4A       |
| FOXRED2                                | UCP2         |
| GABPB1-AS1                             | VASH1        |
| GMPR                                   |              |
| ID1                                    |              |
| IGF2                                   |              |
| INCENP                                 |              |
| KCNQ2                                  |              |
| KSR2                                   |              |
| LINC00342                              |              |
| LRP8                                   |              |
| LRRC45                                 |              |
| MARCKSL1                               |              |
| MEGF6                                  |              |
| MLPH                                   |              |
| MTERF4                                 |              |
| MUC3A                                  |              |
| MYADM                                  |              |
| NEURL1B                                |              |
| NXN                                    |              |
| OLFM2                                  |              |
| PACSIN3                                |              |
| PAQR4                                  |              |
| PDE4A                                  |              |
| POLR3K                                 |              |
| PPM1M                                  |              |
| PRSS16                                 |              |
| PTMA                                   |              |
| RAPGEF5                                |              |
| RCCD1                                  |              |
| RMI2                                   |              |
| RNASET2                                |              |

## Supplementary Table 2

| top 10 in miR200H | top 10 in miR200L |
|-------------------|-------------------|
| ZNF687            | OR52L1            |
| EIF2D             | MED10             |
| GNPDA1            | HTN1              |
| H6PD              | SLCO4A1           |
| LCN10             | HSD17B1           |
| BTBD9             | SAMD13            |
| CHRNA2            | PDLIM1            |
| F9                | NPC1L1            |
| TRIB3             | TMEM81            |
| PROS1             | ZNF334            |
